# Supplementary material for: Guanylation Reactions for the Rational Design of Cancer Therapeutic Agents
Source: MDPI journal article supplement (doi:10.3390/ijms241813820), 2023-09-07
Supplement: s1 [file s1]

SUPPORTING INFORMATION  
FOR

**Guanylation reactions for the rational design of  
cancer therapeutic agents.**

*Almudena del Campo-Balguerías,<sup>†,‡</sup> Blanca Parra-Cadenas,<sup>&</sup> Cristina Nieto-Jimenez,<sup>§</sup>*

*Iván Bravo,<sup>†,§</sup> Elisa Poyatos,<sup>#</sup> Pavel Gancarski,<sup>#</sup> Fernando Carrillo-Hermosilla,<sup>†</sup>*

*Carlos Alonso-Moreno,<sup>†,‡,\*</sup> and Alberto Ocaña<sup>§,\*</sup>*

<sup>†</sup>Unidad nanoDrug, Facultad de Farmacia, Universidad de Castilla-La Mancha, 02008 Albacete, Spain.

<sup>‡</sup>Departamento Química Inorgánica, Orgánica y Bioquímica. ORCATS group. Facultad de Farmacia de Albacete-Centro de Innovación en Química Avanzada (ORFEO-CINQA), Universidad de Castilla-La Mancha, 02008 Albacete, Spain

<sup>&</sup>Departamento de Química Inorgánica, Orgánica y Bioquímica. COMCAT group. Centro de Innovación en Química Avanzada (ORFEO-CINQA), Universidad de Castilla-La Mancha, E-13071 Ciudad Real, Spain.

<sup>§</sup>Experimental Therapeutics Unit, Hospital Clínico San Carlos, IdISSC, Fundación Jiménez Díaz, START. 28040 Madrid, Spain.

<sup>§</sup>Departamento Química-Física. Facultad de Farmacia de Albacete, FOTOAIR group, Universidad de Castilla-La Mancha, 02008 Albacete, Spain

<sup>#</sup>Cancerappy, Avda Ribera De Axpe, 28, 48950 Erandio, Bizkaia, Spain.

$^1\text{H}$ -NMR of ACB7 in  $\text{CDCl}_3$ .

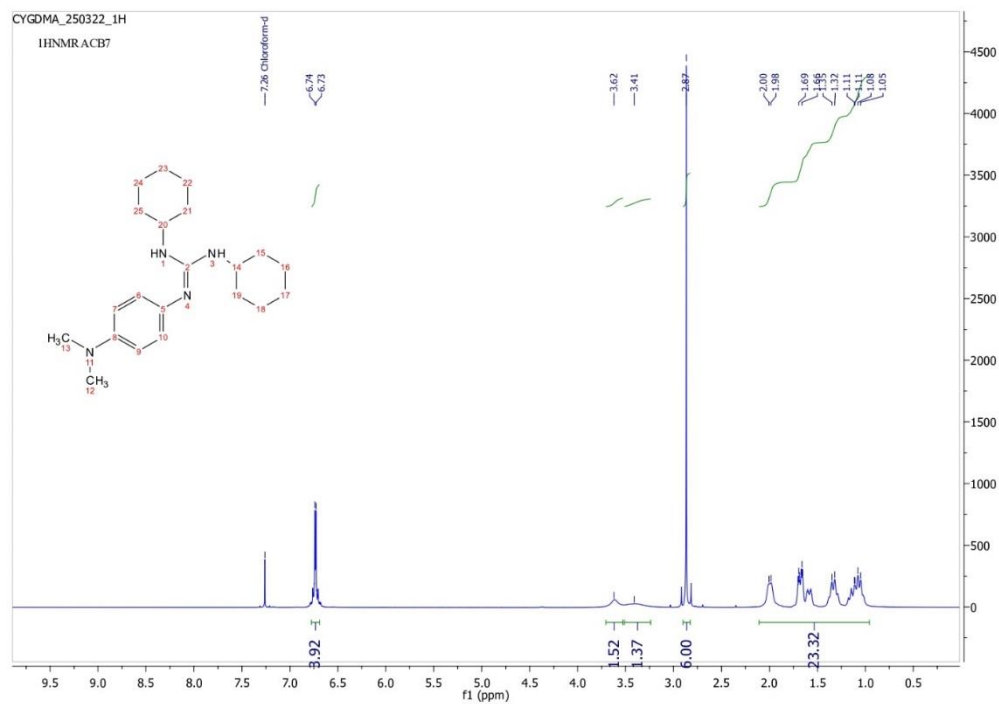

$^{13}\text{C}$ -NMR of ACB7 in  $\text{CDCl}_3$ .

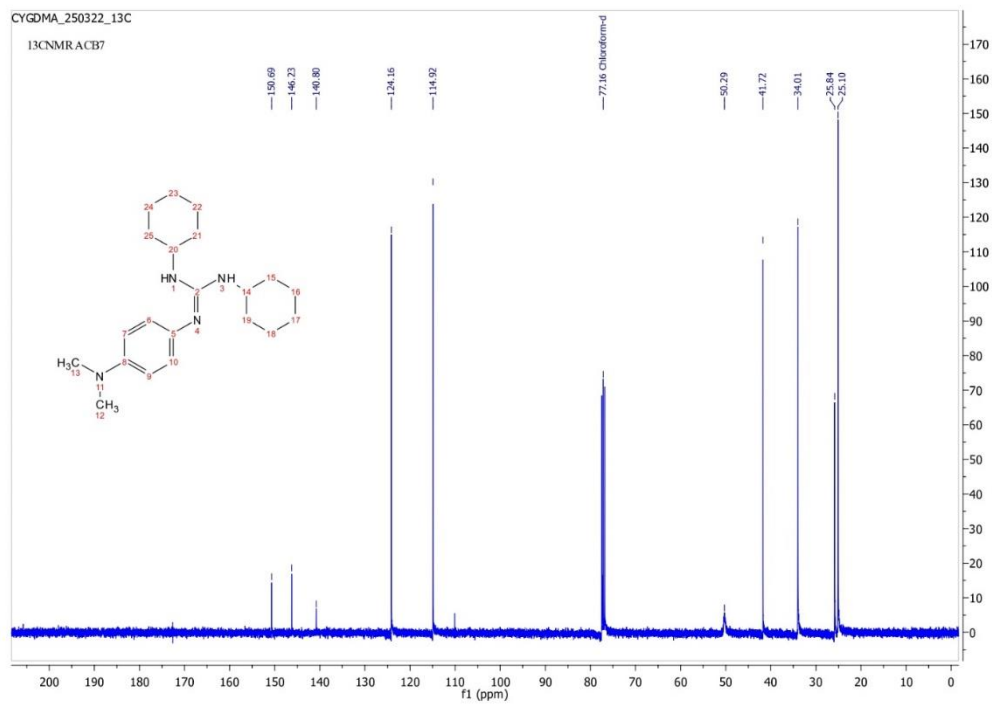

Multinuclear 2D ( $^1\text{H}$ - $^{13}\text{C}$  HSQC) of ACB7

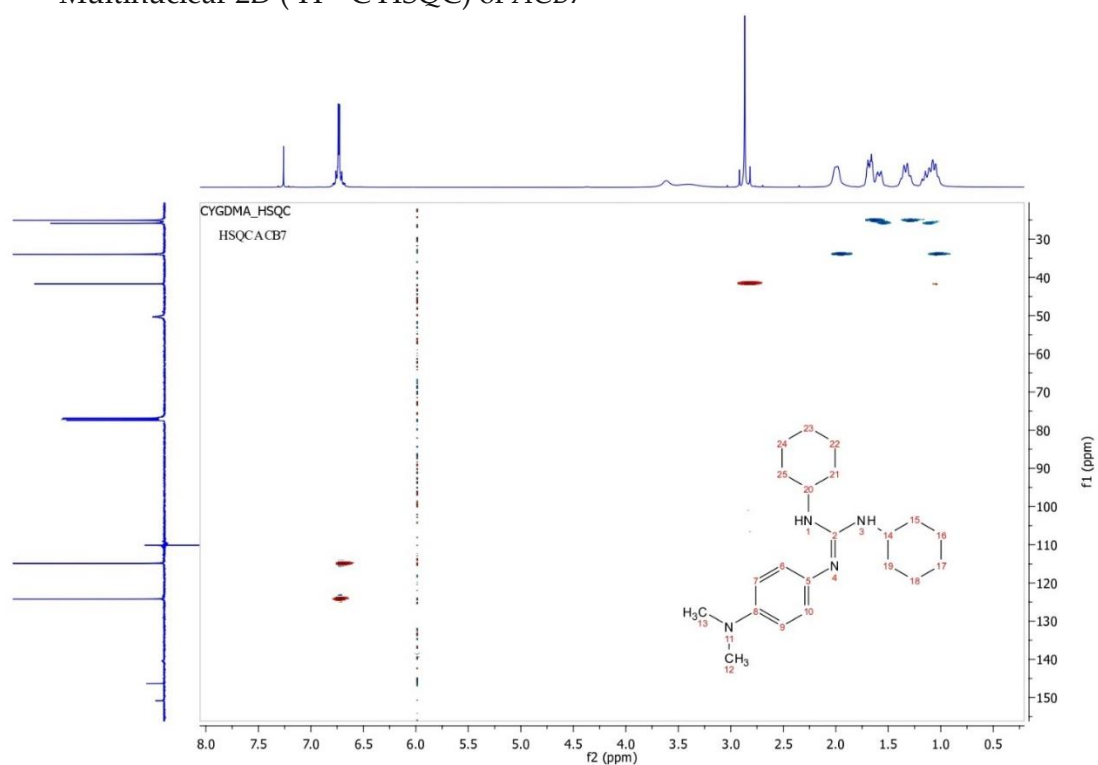

Multinuclear 2D ( $^1\text{H}$ - $^1\text{H}$  COSY) of ACB7

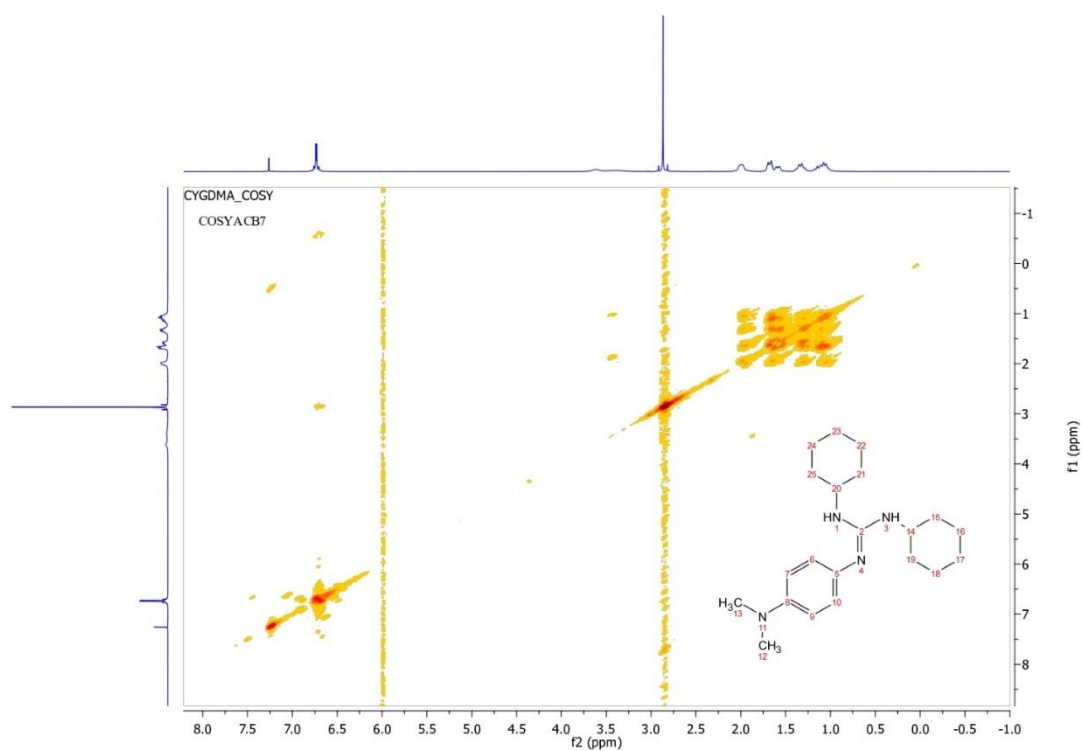

**Figure S1.**  $^1\text{H}$ -NMR,  $^{13}\text{C}$ -NMR, multinuclear 2D ( $^1\text{H}$ - $^{13}\text{C}$  HSQC) and multinuclear 2D ( $^1\text{H}$ - $^1\text{H}$  COSY) NMR spectra of ACB7

<sup>1</sup>H-NMR of ACB10 in CDCl<sub>3</sub>.

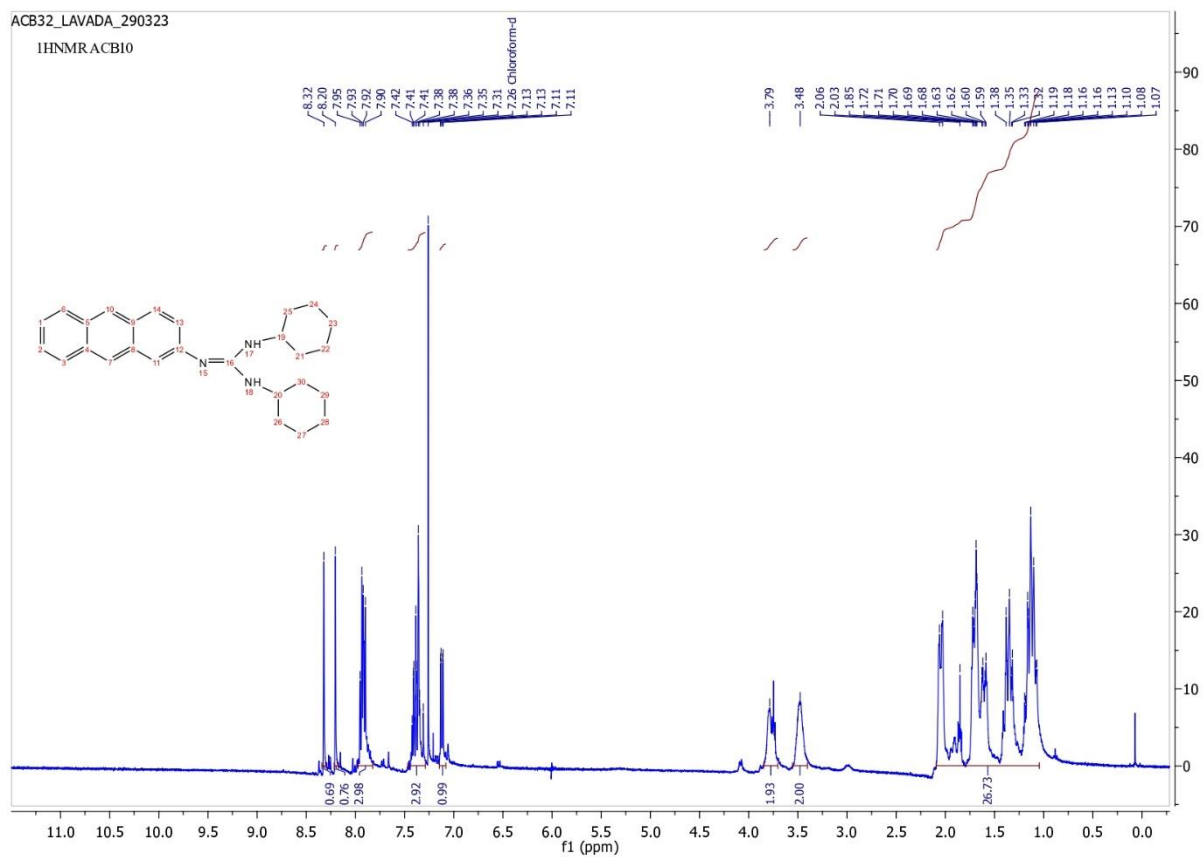

<sup>13</sup>C-NMR of ACB10 in CDCl<sub>3</sub>

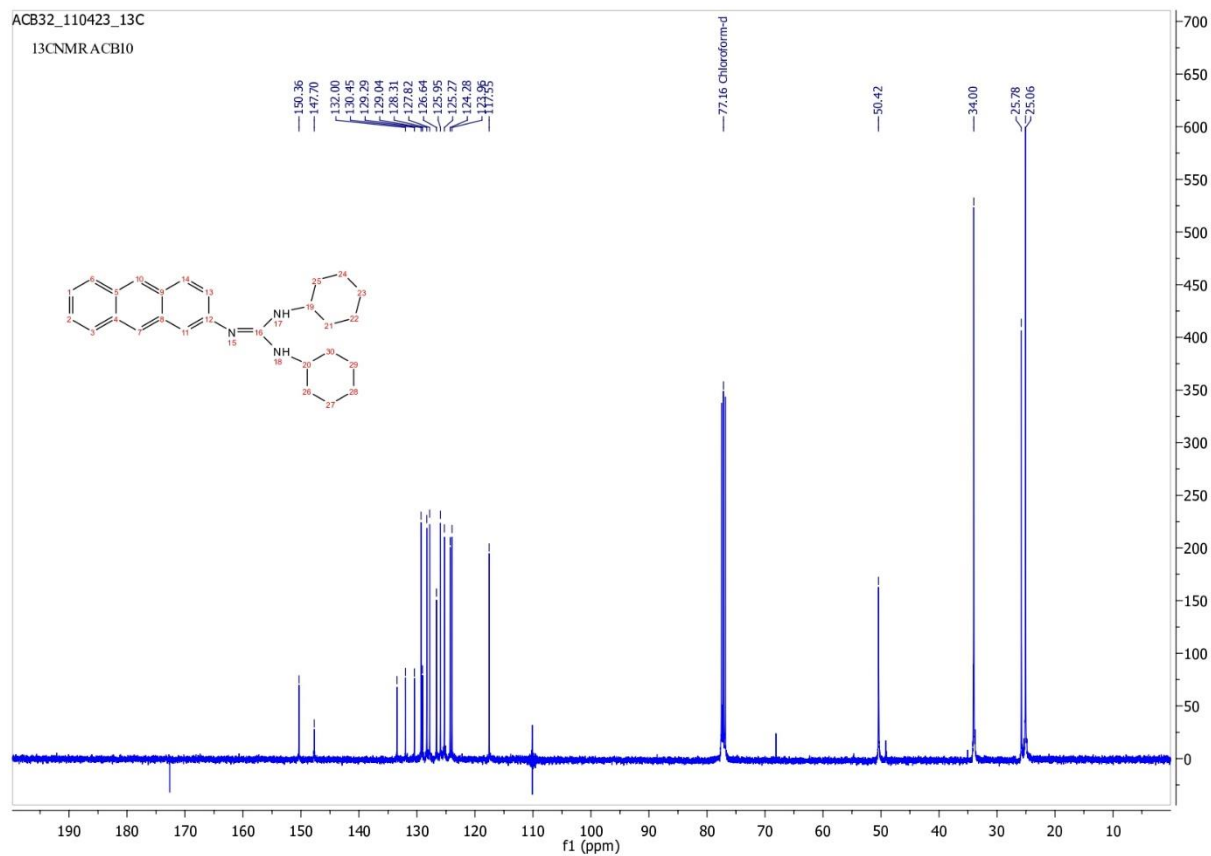

Multinuclear 2D ( $^1\text{H}$ - $^{13}\text{C}$  HSQC) of *ACB10*.

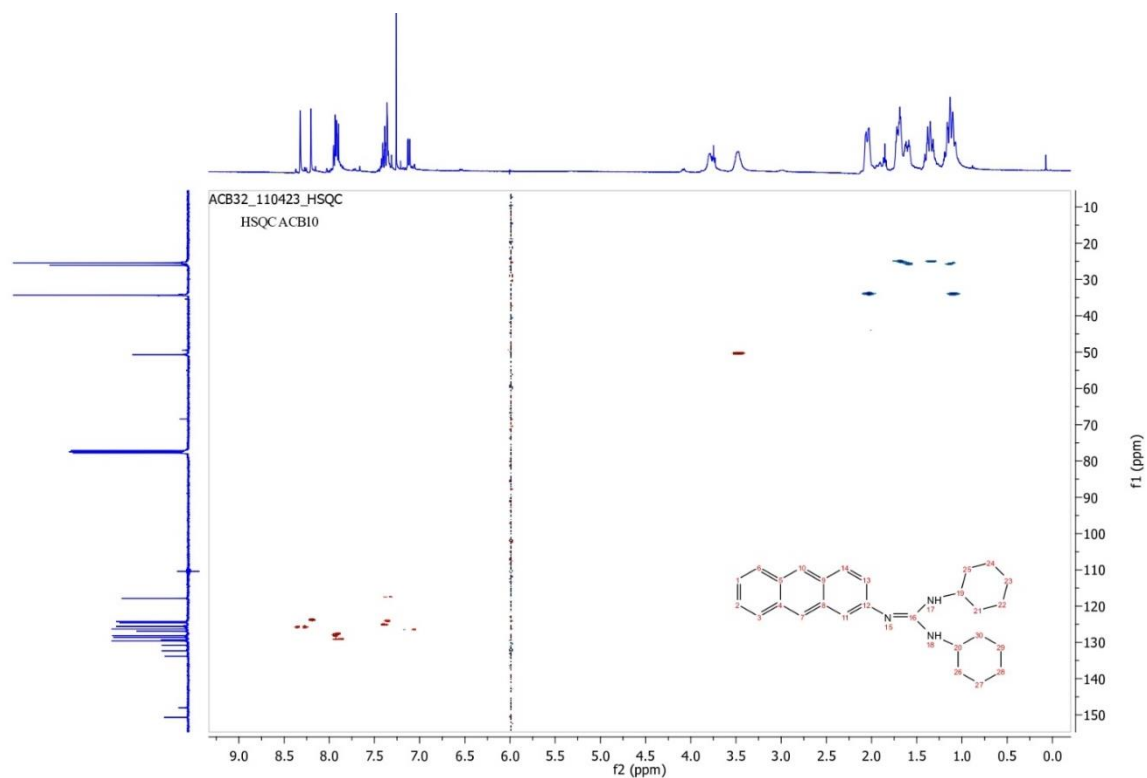

Multinuclear 2D ( $^1\text{H}$ - $^1\text{H}$  COSY) of *ACB10*

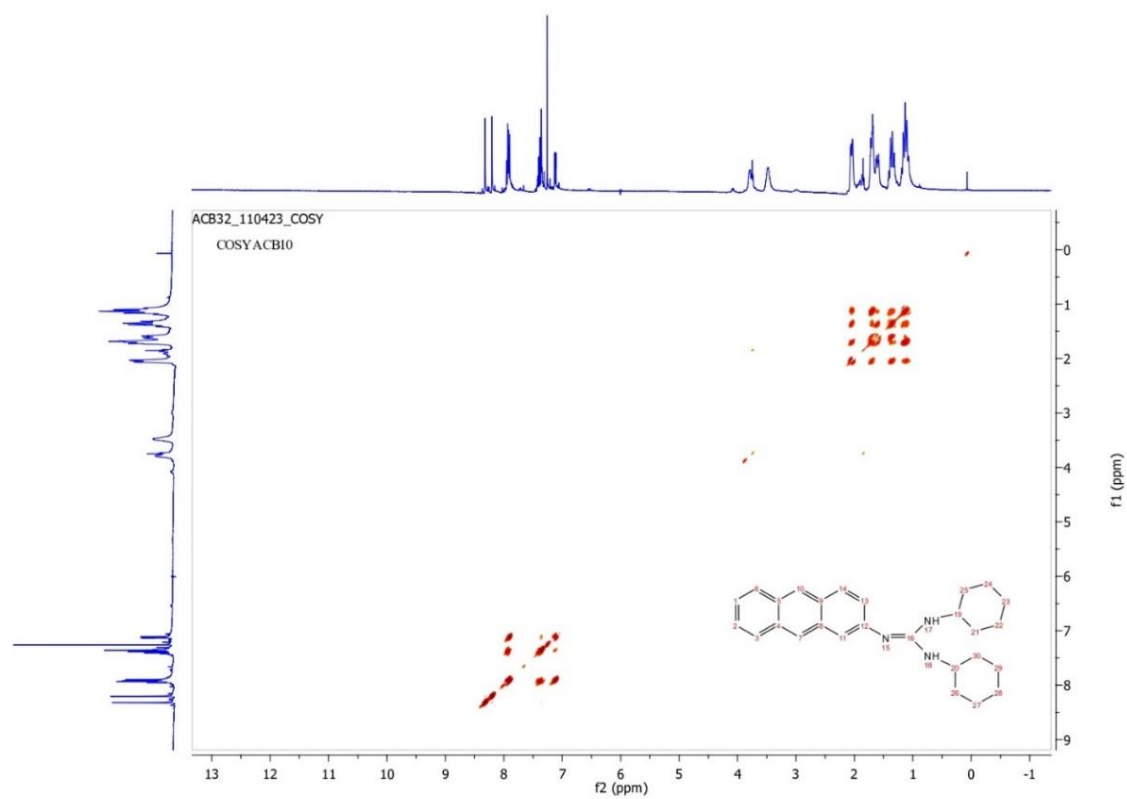

**Figure S2.**  $^1\text{H}$ -NMR,  $^{13}\text{C}$ -NMR, multinuclear 2D ( $^1\text{H}$ - $^{13}\text{C}$  HSQC) and multinuclear 2D ( $^1\text{H}$ - $^1\text{H}$  COSY) NMR spectra of *ACB10*.

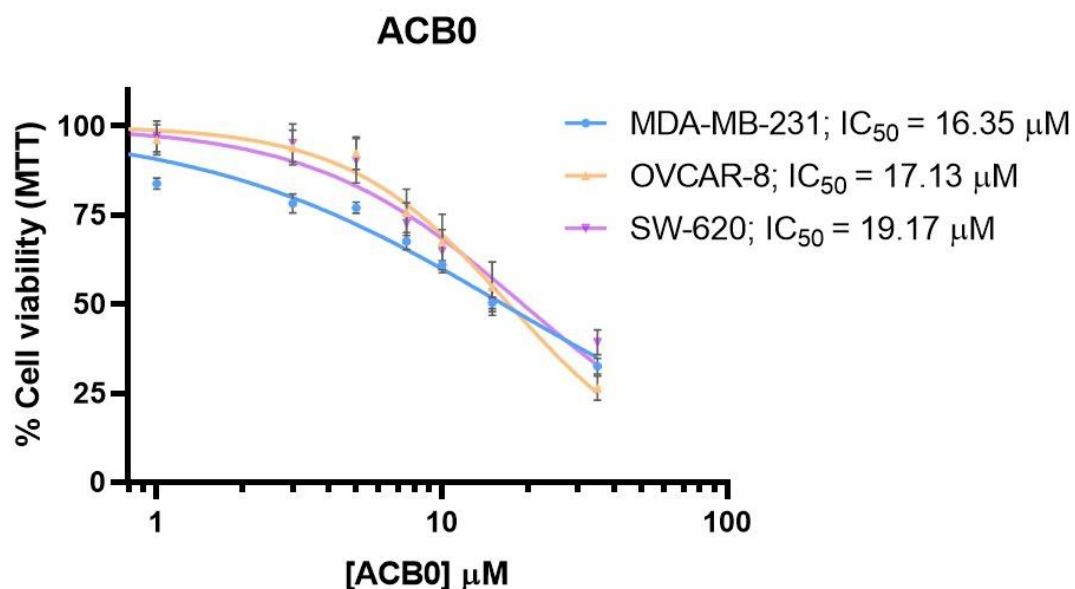

**Figure S3.** Antiproliferative effect induced by different concentrations of *ACB0* in the indicated cell lines at 72 h tested by MTT assay. Calculation of the concentrations  $\text{IC}_{50}$  based on a nonlinear regression curve fit (log(inhibitor) vs. normalized response-variable slope). The mean of three independent experiments (each in triplicate) is plotted together with the standard error (SEM).

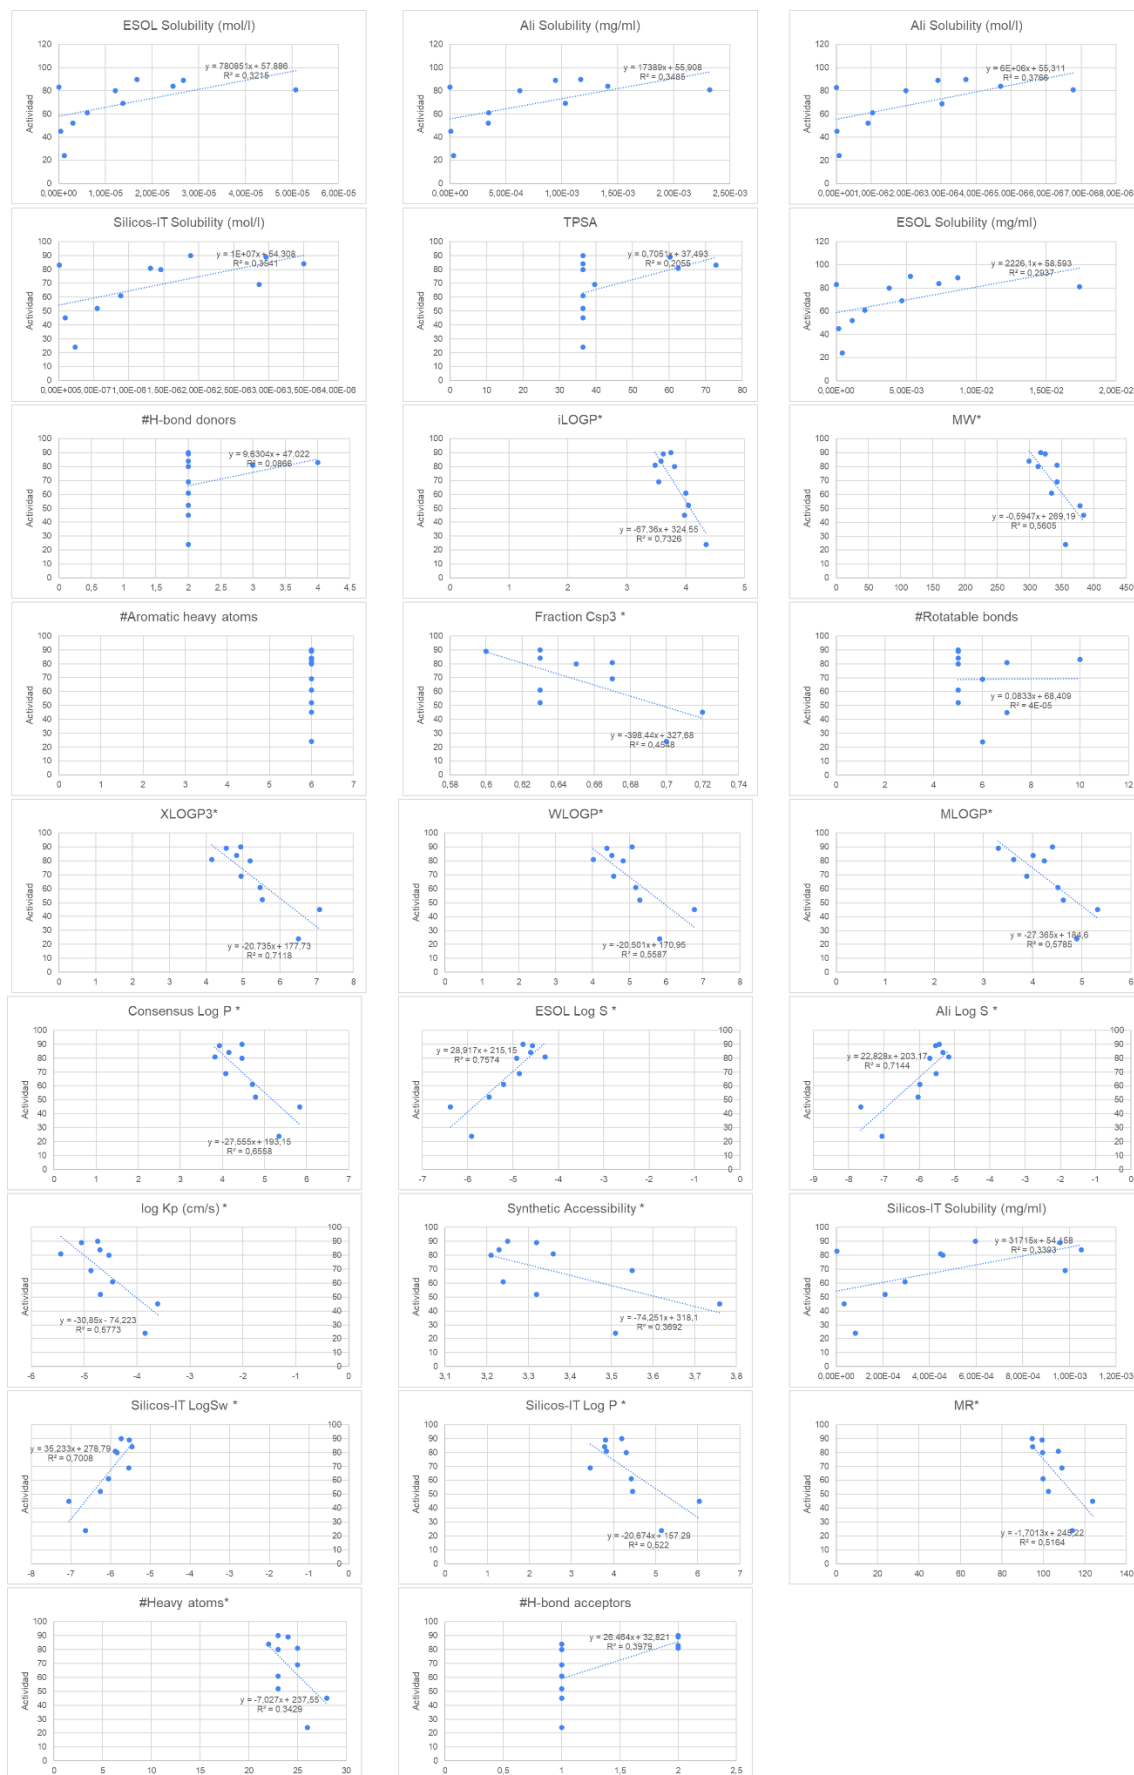

**Figure S4:** Correlations between ADME parameters.

## ACB10

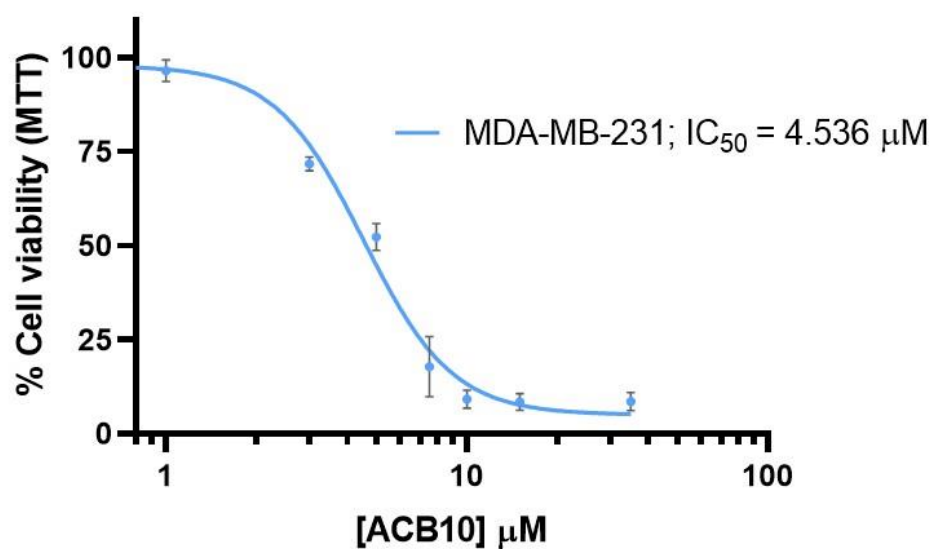

**Figure S5:** Antiproliferative effect induced by different concentrations of *ACB10* fluorescent guanidine in the MDA-MB-231 cell line at 72 h tested by MTT assay. The inhibitory concentration 50 (IC<sub>50</sub>) for MDA-MB-231 cell line is shown. Calculation of the concentrations IC<sub>50</sub> based on a nonlinear regression curve fit (log(inhibitor) vs. response-variable slope). The mean of three independent experiments (each in triplicate) is plotted together with the standard error (SEM).
